# Supplementary material
Source: publisher site journal article supplement (https://www.dovepress.com/article/571886)
Supplement: Supplementary file 1 [file 571886%20Revised%20Supplementary%20Material.docx]

**Appendix S1**

History of smoking: defined as smoking one cigarette a day for at least 6 months currently or in the past.

History of drinking: defined as consuming alcohol once every week for at least 6 months currently or in the past.

History of coronary heart disease: defined as history of coronary heart disease among first-degree relatives, male under 55 years old, female under 65 years old.

**Appendix S2**

The following were typical parameters for the cine picture protocol: Flip Angle: 80°, repetition time (TR)/echo time (TE) = 1.43/3.26 ms, slice thickness: 7 mm.

The scanning parameters for T1 mapping before contrast agent injection were as follows: a bSSFP single-shot readout with a 35° excitation flip angle, rate-2 parallel imaging, matrix size of 256 × 164, pixel size of 1.3 mm × 1.3 mm, slice thickness of 8 mm, minimum inversion time (TI) of 189 ms and incremented by 80 ms, TE/TR echo spacing of 1.15 ms/2.77 ms. After the contrast agent injection, the T1 imaging parameters were modified to include a bSSFP single-shot readout with a reduced excitation flip angle of 20°, rate-2 parallel imaging, matrix size of 192 × 164, pixel size of 1.9 mm × 1.9mm, slice thickness of 8 mm, minimum TI of 100 ms with 80 ms increments, and TE/TR echo spacing of 1.01 ms/2.44 ms.

**Appendix S3**

**Supplementary Table S1. Intra- and interobserver variability**

| **Variables** | **ICC** |
| --- | --- |
| **Native T1** |  |
| Intra: | 0.985(0.981,0.988) |
| Inter: | 0.992(0.990,0.994) |
| **ECV** |  |
| Intra: | 0.975(0.969,0.981) |
| Inter: | 0.988(0.984,0.990) |
| **Indexed EAT volume** |  |
| Intra: | 0.924(0.905,0.940) |
| Inter: | 0.961(0.950,0.969) |

Abbreviations: ICC = Intraclass Correlation Coefficient, ECV = Extracellular volume, EAT = Epicardial adipose tissue.

**Supplementary Table S2. Collinearity test of multiple model Cox regression variables**

| **Variables** | **VIF** |
| --- | --- |
| LVESVi | 3.60 |
| LVEF | 3.54 |
| LVGLS | 3.49 |
| LVGRS | 3.26 |
| LGE | 1.35 |
| Sex | 1.07 |
| Diabetes | 1.07 |
| Family history of CAD | 1.07 |
| EAT | 1.07 |
| Hypertension | 1.06 |
| SIRI | 1.05 |

Abbreviations: LVESVi = LV end-systolic volume index, LVEF = LV ejection fraction, LVGLS = LV global longitudinal strain, LVGRS = LV global radial strain, LGE = late gadolinium enhancement, CAD = Coronary Artery Disease, EAT = Epicardial adipose tissue, SIRI=systemic inflammation response index.
